# Supplementary material for: Comparative Analysis of Original and Replaced Gut Microbiomes within Same Individuals Identified the Intestinal Microbes Associated with Weight Gaining
Source: MDPI journal article supplement (doi:10.3390/microorganisms10051062), 2022-05-20
Supplement: s1 [file s1]

# Supplementary Materials

## Supplemental Figures

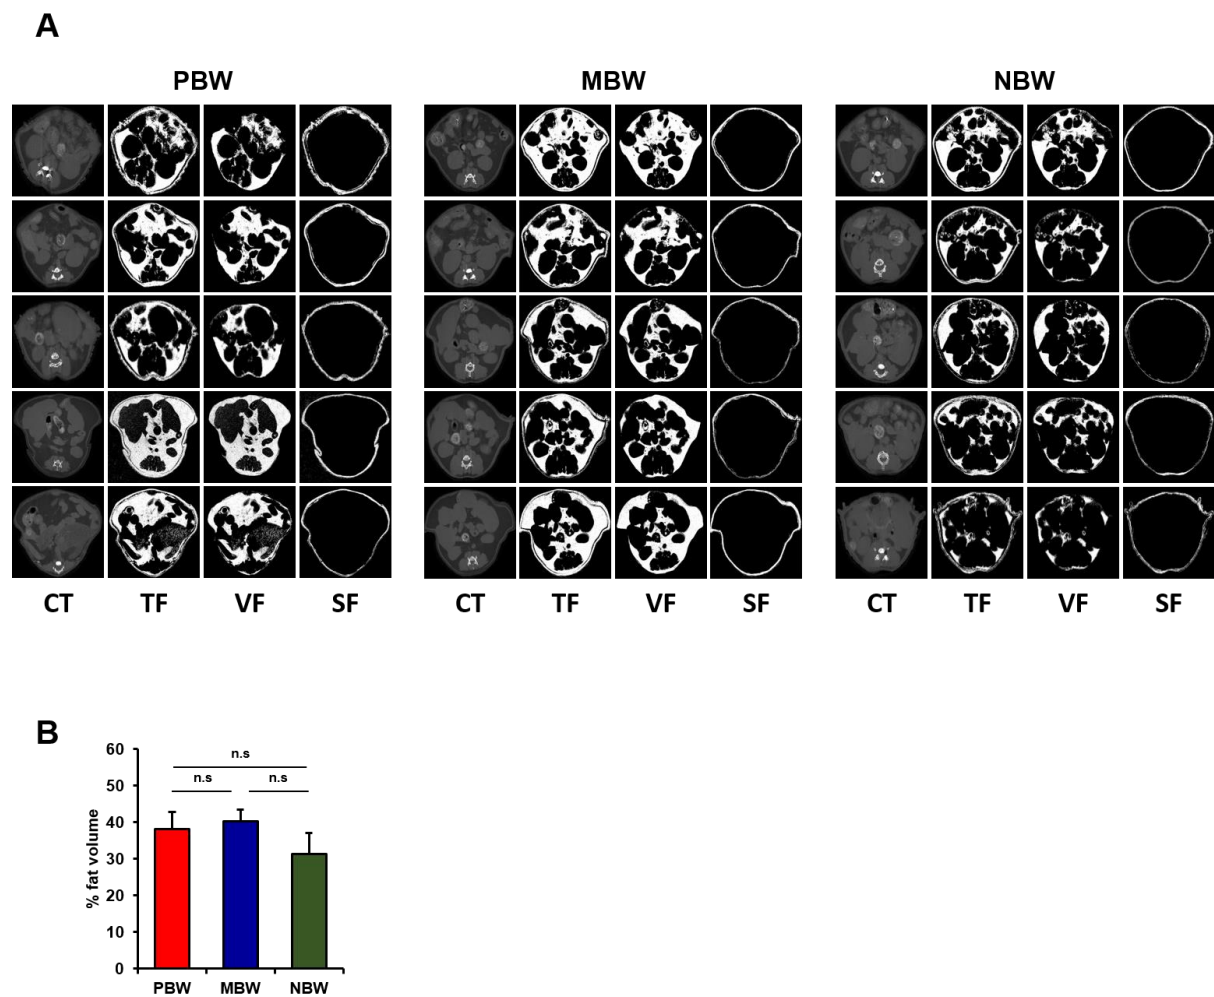

**Figure S1.** The representative micro-CT image of each experimental mouse of the PBW, MBW, and NBW groups three months after the gut microbiome replacement. (A) Micro-CT image, (B) The fat volume change of each group. TF, total fat; VF, visceral fat; SF, subcutaneous fat. The values are represented as mean  $\pm$  SEM. *n.s.*: not significant ( $p > 0.05$ ).

**A**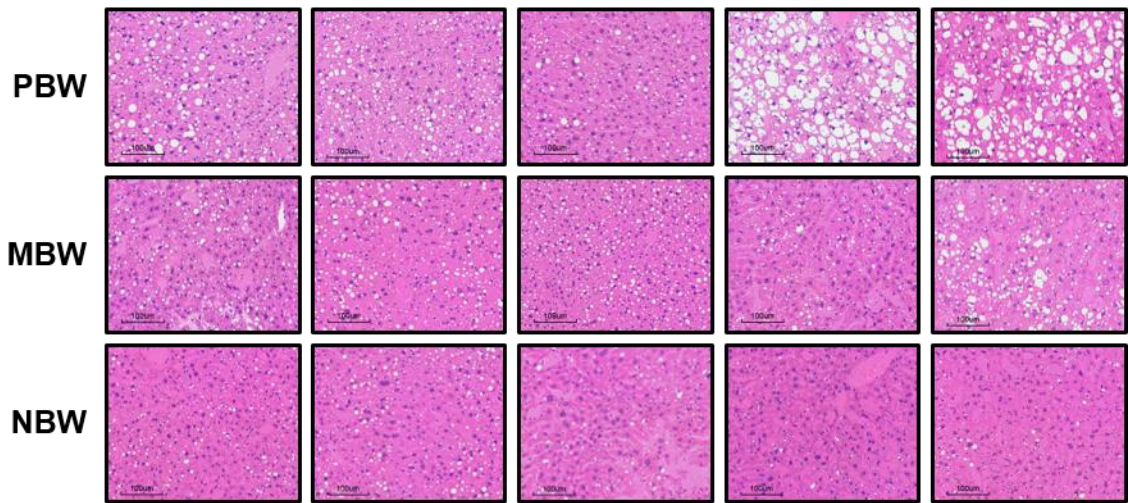**B**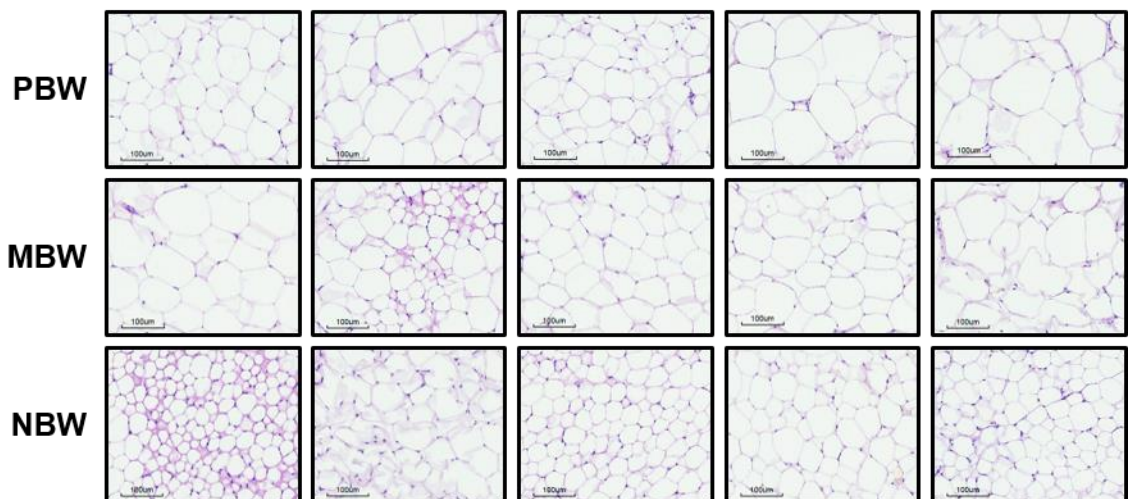

**Figure S2. The representative histological images of each experimental mouse of the PBW, MBW, and NBW groups three months after gut microbiome replacement. (A) The H&E-stained liver images. (B) The H&E-stained adipose tissue images. Scale bars, 100 µm in all the images.**

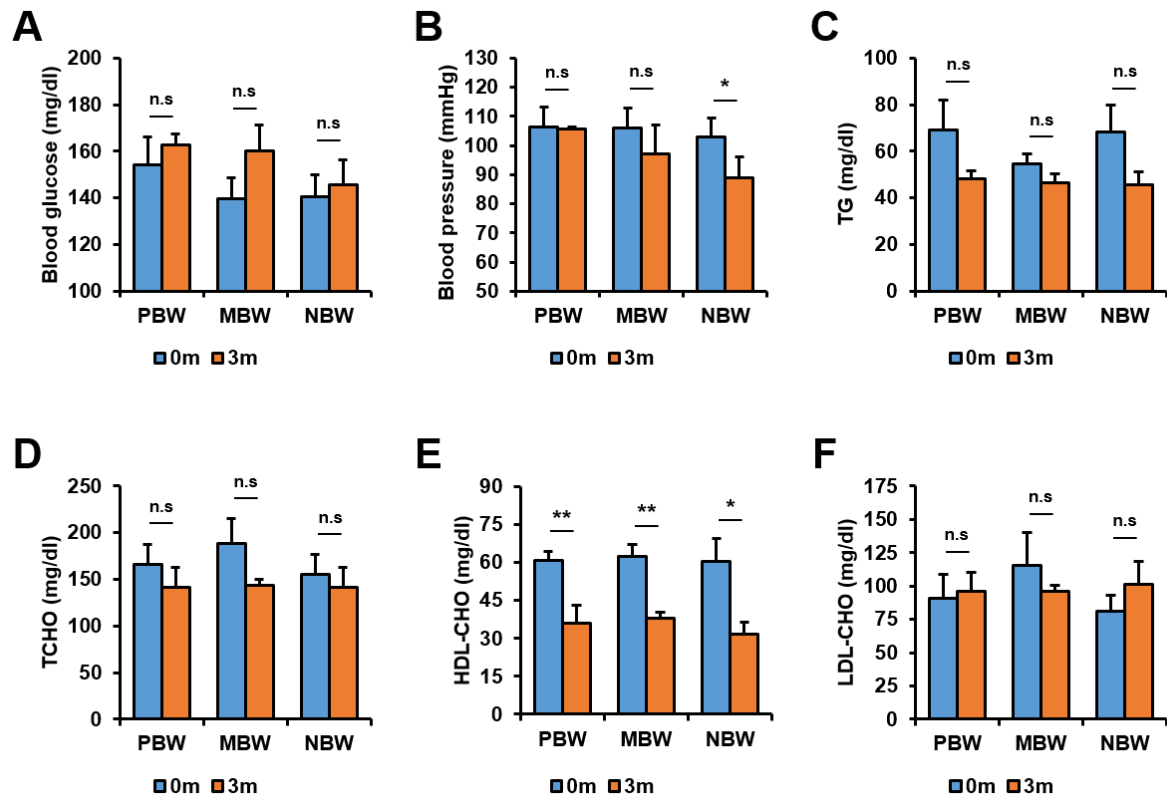

**Figure S3. The effects of the gut microbiome replacement on the changes in the blood glucose, blood pressure, and lipid levels.** The average values of (A) Blood glucose, (B) Blood pressure, (C) Total glycerol (TG), (D) Total cholesterol (TCHO), (E) HDL-cholesterol (HDL-CHO) (F) LDL-cholesterol (LDL-CHO) of each group are shown. The values are represented as mean  $\pm$  SEM. 0m represents before the gut microbiome replacement, and 3m represents 3 months after the gut microbiome replacement. \* $p < 0.05$ ; \*\* $p < 0.01$ ; n.s.: not significant ( $p > 0.05$ ).

**A**

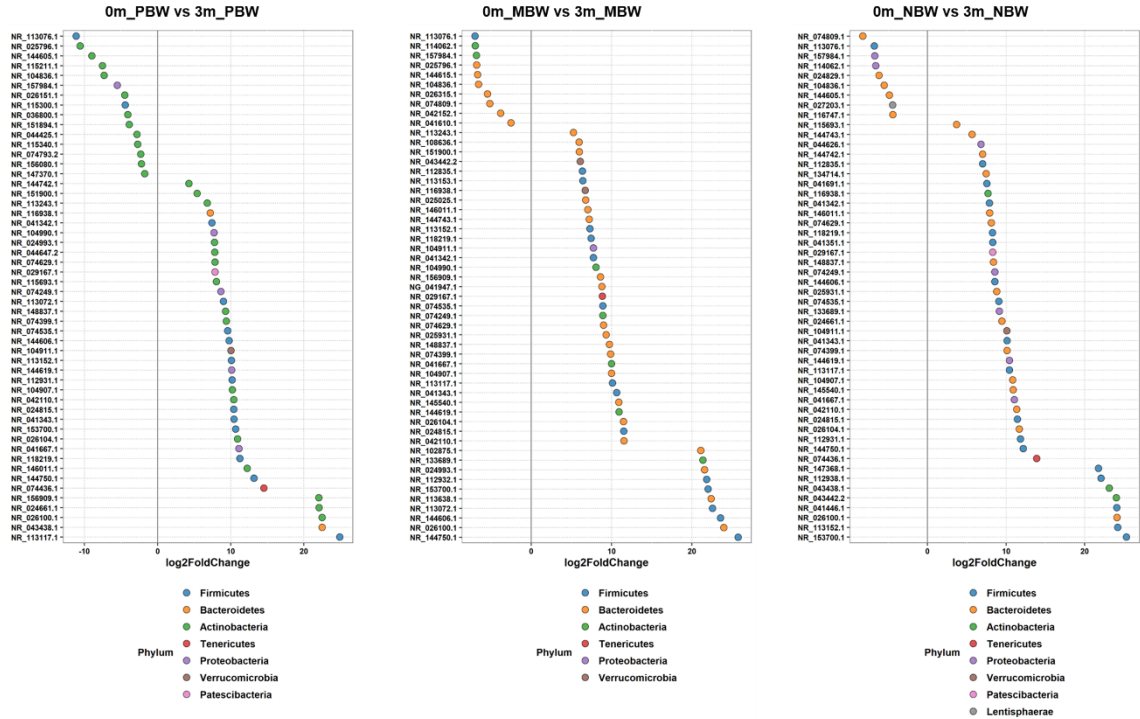

**B**

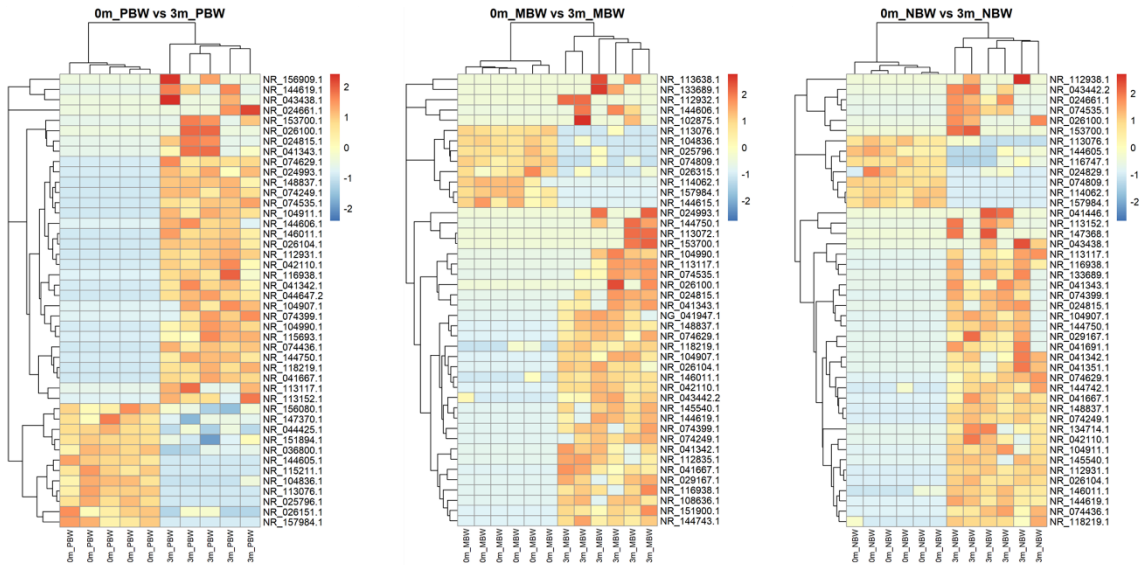

**Figure S4. Differential abundance analysis of species changes of each group before and after the gut microbiome replacement. (A)** Dotplots showing significantly differentially abundant OTUs, where OTUs are sorted by species along the y-axis and colored by phylum, analyzed by DESeq2 differential abundance analysis. The x-axis indicates the log2 fold-change in 3 month of each group compared to 0 month of each groups as baseline. **(B)** Heatmaps of significantly differentially abundant species in 0 month and 3 month of each group.





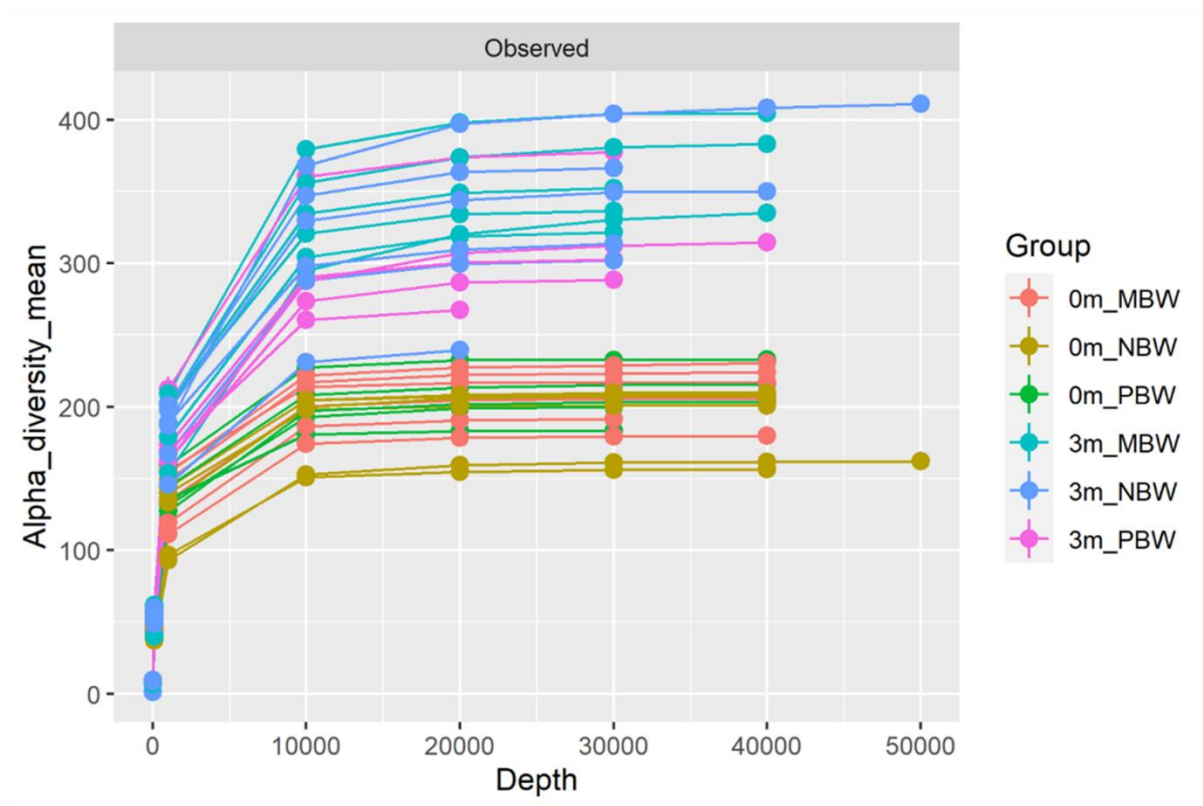

**Figure S6. Rarefaction curves of each sample.** Rarefaction curve constructed based on observed richness.

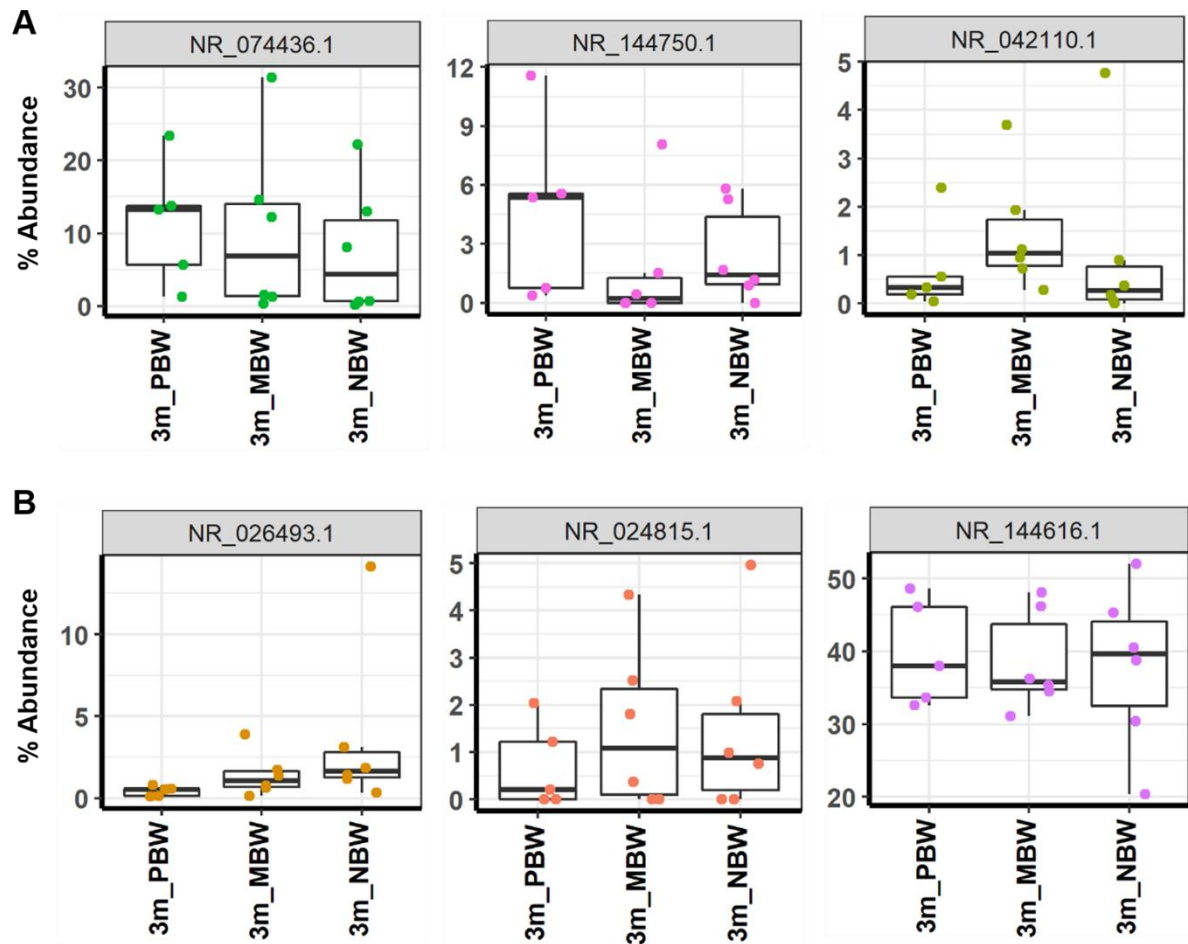

**Figure S7.** The relative abundance of the top 3 relatively abundant gut microbiota at the species level in PBW and NBW groups from 3 month after gut microbiome replacement. **(A)** Relative distribution by sample group of the species more abundant in the PBW group than in the NBW group. **(B)** Relative distribution by sample group of the species more abundant in the NBW group than in the PBW group.



**Table S1. The valid reads of the 16S rRNA amplicon sequence.**

| <b>Group</b>       | <b>0m_PBW</b>   | <b>0m_MBW</b>   | <b>0m_NBW</b>   | <b>3m_PBW</b>   | <b>3m_MBW</b>   | <b>3m_NBW</b>   |
|--------------------|-----------------|-----------------|-----------------|-----------------|-----------------|-----------------|
| <b>Total reads</b> | 42029<br>± 3363 | 43137<br>± 1116 | 44629<br>± 1727 | 33441<br>± 2994 | 40193<br>± 2538 | 37144<br>± 4007 |

All values are mean ±SEM.OTUs,operationaltaxonomic units.

**Table S2. Comparison of taxonomy abundance at the phylum level.**

|   | Phylum              | 0m_PBW (%) | 0m_MBW (%) | 0m_NBW (%) | 3m_PBW (%) | 3m_MBW (%) | 3m_NBW (%) | Total (%) |
|---|---------------------|------------|------------|------------|------------|------------|------------|-----------|
| 1 | D_1_Verrucomicrobia | 0          | 0.52       | 0          | 11.48      | 10.23      | 7.44       | 4.94      |
| 2 | D_1_Bacteroidetes   | 52.12      | 54.39      | 63.02      | 53.22      | 49.30      | 51.29      | 53.89     |
| 3 | D_1_Firmicutes      | 44.99      | 41.44      | 34.23      | 30.73      | 36.61      | 36.85      | 37.47     |
| 4 | D_1_Patescibacteria | 2.16       | 2.89       | 2.21       | 0.66       | 0.37       | 0.21       | 1.42      |
| 5 | D_1_Actinobacteria  | 0.23       | 0.07       | 0.08       | 0.81       | 0.66       | 0.84       | 0.450     |
| 6 | D_1_Proteobacteria  | 0.32       | 0.47       | 0.33       | 2.22       | 2.17       | 2.45       | 1.33      |
| 7 | D_1_Tenericutes     | 0.18       | 0.22       | 0.14       | 0.37       | 0.54       | 0.40       | 0.308     |
| 8 | D_1_Cyanobacteria   | 0          | 0.002      | 0          | 0.51       | 0.11       | 0.51       | 0.189     |
| 9 | D_1_Lentisphaerae   | 0          | 0          | 0          | 0.001      | 0.01       | 0          | 0.001     |

**Table S3. Comparison of taxonomy abundance at the class level.**

|    | Class                   | 0m_ PBW (%) | 0m_ MBW (%) | 0m_ NBW (%) | 3m_ PBW (%) | 3m_ MBW (%) | 3m_ NBW (%) |
|----|-------------------------|-------------|-------------|-------------|-------------|-------------|-------------|
| 1  | D_2_Verrucomicrobiae    | 0           | 0.52        | 0           | 11.48       | 10.23       | 7.44        |
| 2  | D_2_Bacteroidia         | 52.12       | 54.39       | 63.02       | 53.22       | 49.30       | 51.29       |
| 3  | D_2_Clostridia          | 42.65       | 38.42       | 30.35       | 24.61       | 30.80       | 31.96       |
| 4  | D_2_Erysipelotrichia    | 0.79        | 0.90        | 0.92        | 4.86        | 4.99        | 3.63        |
| 5  | D_2_Saccharimonadia     | 2.16        | 2.89        | 2.21        | 0.66        | 0.37        | 0.21        |
| 6  | D_2_Bacilli             | 1.55        | 2.12        | 2.96        | 1.26        | 0.82        | 1.26        |
| 7  | D_2_Actinobacteria      | 0.18        | 0.007       | 0.00        | 0.66        | 0.56        | 0.67        |
| 8  | D_2_Coriobacteriia      | 0.05        | 0.07        | 0.08        | 0.15        | 0.10        | 0.18        |
| 9  | D_2_Deltaproteobacteria | 0.22        | 0.15        | 0.17        | 0.18        | 0.27        | 0.15        |
| 10 | D_2_Gammaproteobacteria | 0.08        | 0.28        | 0.10        | 1.66        | 1.52        | 1.60        |
| 11 | D_2_Mollicutes          | 0.18        | 0.22        | 0.14        | 0.37        | 0.54        | 0.40        |
| 12 | D_2_Alphaproteobacteria | 0.02        | 0.05        | 0.06        | 0.38        | 0.38        | 0.70        |
| 13 | D_2_Melainabacteria     | 0           | 0           | 0           | 0.51        | 0.10        | 0.51        |
| 14 | D_2_Oxyphotobacteria    | 0           | 0.002       | 0           | 0.001       | 0.004       | 0.004       |
| 15 | D_2_Lentisphaeria       | 0           | 0           | 0           | 0.001       | 0.005       | 0           |

**Table S4. Comparison of taxonomy abundance at the order level.**

|    | Order                     | 0m_PBW<br>(%) | 0m_MBW<br>(%) | 0m_NBW<br>(%) | 3m_PBW<br>(%) | 3m_MBW<br>(%) | 3m_NBW<br>(%) |
|----|---------------------------|---------------|---------------|---------------|---------------|---------------|---------------|
| 1  | D_3_Verrucomicrobiales    | 0             | 0.52          | 0             | 11.48         | 10.23         | 7.44          |
| 2  | D_3_Bacteroidales         | 52.12         | 54.38         | 63.02         | 53.21         | 49.28         | 51.25         |
| 3  | D_3_Clostridiales         | 42.65         | 38.42         | 30.35         | 24.61         | 30.80         | 31.96         |
| 4  | D_3_Erysipelotrichales    | 0.79          | 0.90          | 0.92          | 4.86          | 4.99          | 3.63          |
| 5  | D_3_Saccharimonadales     | 2.16          | 2.89          | 2.21          | 0.66          | 0.37          | 0.21          |
| 6  | D_3_Lactobacillales       | 1.55          | 2.12          | 2.96          | 1.26          | 0.82          | 1.26          |
| 7  | D_3_Bifidobacteriales     | 0.18          | 0.01          | 0             | 0.66          | 0.56          | 0.67          |
| 8  | D_3_Desulfovibrionales    | 0.22          | 0.15          | 0.17          | 0.18          | 0.27          | 0.15          |
| 9  | D_3_Betaproteobacteriales | 0             | 0.01          | 0             | 1.64          | 1.51          | 1.59          |
| 10 | D_3_Mollicutes RF39       | 0.18          | 0.22          | 0.14          | 0.23          | 0.27          | 0.22          |
| 11 | D_3_Enterobacteriales     | 0.04          | 0.22          | 0.05          | 0.007         | 0.009         | 0.008         |
| 12 | D_3_Rhodospirillales      | 0             | 0             | 0             | 0.37          | 0.37          | 0.69          |
| 13 | D_3_Gastranaerophilales   | 0             | 0             | 0             | 0.51          | 0.10          | 0.51          |
| 14 | Other < 0.5%              | 0.11          | 0.18          | 0.19          | 0.32          | 0.43          | 0.41          |

**Table S5. Comparison of taxonomy abundance at the family level.**

|    | Family                            | 0m_<br>PBW<br>(%) | 0m_<br>MBW<br>(%) | 0m_<br>NBW<br>(%) | 3m_<br>PBW<br>(%) | 3m_<br>MBW<br>(%) | 3m_<br>NBW<br>(%) |
|----|-----------------------------------|-------------------|-------------------|-------------------|-------------------|-------------------|-------------------|
| 1  | D_4_Akkermansiaceae               | 0                 | 0.52              | 0                 | 11.48             | 10.23             | 7.45              |
| 2  | D_4_Muribaculaceae                | 50.92             | 51.90             | 61.60             | 39.81             | 38.65             | 37.93             |
| 3  | D_4_Lachnospiraceae               | 29.14             | 25.88             | 20.04             | 14.75             | 17.32             | 17.69             |
| 4  | D_4_Erysipelotrichaceae           | 0.79              | 0.90              | 0.92              | 4.86              | 4.99              | 3.63              |
| 5  | D_4_Saccharimonadaceae            | 2.16              | 2.89              | 2.21              | 0.66              | 0.37              | 0.21              |
| 6  | D_4_Tannerellaceae                | 0.95              | 1.40              | 1.21              | 0.80              | 0.97              | 0.77              |
| 7  | D_4_Lactobacillaceae              | 1.54              | 2.08              | 2.95              | 1.25              | 0.79              | 1.26              |
| 8  | D_4_Ruminococcaceae               | 10.96             | 9.69              | 7.92              | 8.34              | 12.11             | 12.62             |
| 9  | D_4_Prevotellaceae                | 0                 | 0                 | 0                 | 7.35              | 3.95              | 5.81              |
| 10 | D_4_Bacteroidaceae                | 0                 | 0.78              | 0                 | 1.78              | 2.13              | 2.61              |
| 11 | D_4_Clostridiales vadinBB60 group | 1.42              | 1.12              | 1.36              | 0.73              | 0.92              | 0.82              |
| 12 | D_4_Rikenellaceae                 | 0.28              | 0.32              | 0.22              | 2.87              | 2.66              | 3.65              |
| 13 | D_4_Bifidobacteriaceae            | 0.19              | 0.01              | 0                 | 0.66              | 0.56              | 0.67              |
| 14 | D_4_Desulfovibrionaceae           | 0.22              | 0.15              | 0.17              | 0.18              | 0.27              | 0.15              |
| 15 | D_4_Burkholderiaceae              | 0                 | 0.007             | 0.00              | 1.65              | 1.51              | 1.60              |
| 16 | D_4_Peptococcaceae                | 0.22              | 0.18              | 0.15              | 0.47              | 0.23              | 0.38              |
| 17 | D_4_Clostridiaceae 1              | 0.29              | 0.44              | 0.31              | 0.13              | 0.07              | 0.22              |
| 18 | D_4_Marinifilaceae                | 0                 | 0                 | 0                 | 0.64              | 0.96              | 0.52              |
| 19 | D_4_Peptostreptococcaceae         | 0.48              | 0.92              | 0.39              | 0.04              | 0                 | 0.06              |
| 20 | D_4_uncultured bacterium          | 0.12              | 0.18              | 0.07              | 0.07              | 0.14              | 0.06              |
| 21 | D_4_Enterobacteriaceae            | 0.04              | 0.22              | 0.05              | 0.007             | 0.009             | 0.008             |
| 22 | D_4_uncultured                    | 0                 | 0                 | 0                 | 0.37              | 0.37              | 0.69              |
| 23 | D_4_uncultured bacterium          | 0                 | 0                 | 0                 | 0.46              | 0.08              | 0.47              |
| 24 | Other < 0.5%                      | 0.29              | 0.41              | 0.45              | 0.63              | 0.70              | 0.72              |

**Table S6. Comparison of taxonomy abundance at the genus level.**

|    | Genus                                     | 0m_<br>PBW<br>(%) | 0m_<br>MBW<br>(%) | 0m_<br>NBW<br>(%) | 3m_<br>PBW<br>(%) | 3m_<br>MBW<br>(%) | 3m_<br>NBW<br>(%) |
|----|-------------------------------------------|-------------------|-------------------|-------------------|-------------------|-------------------|-------------------|
| 1  | D_5_Akkermansia                           | 0                 | 0.66              | 0                 | 12.66             | 11.50             | 8.15              |
| 2  | Ambiguous_taxa                            | 3.21              | 5.15              | 5.41              | 11.53             | 12.34             | 10.08             |
| 3  | D_5_uncultured organism                   | 13.77             | 13.90             | 22.18             | 0.48              | 0.34              | 0.52              |
| 4  | D_5_uncultured bacterium                  | 31.40             | 29.50             | 29.88             | 18.08             | 12.05             | 17.89             |
| 5  | D_5_Turicibacter                          | 0.93              | 1.09              | 1.18              | 1.71              | 1.82              | 1.27              |
| 6  | D_5_uncultured Bacteroidales bacterium    | 1.97              | 1.65              | 1.95              | 6.43              | 9.07              | 6.19              |
| 7  | D_5_Lachnospiraceae NK4A136 group         | 9.13              | 7.79              | 6.62              | 8.42              | 10.77             | 12.35             |
| 8  | D_5_[Eubacterium] coprostanoligenes group | 0.04              | 0.04              | 0.04              | 0.92              | 0.80              | 1.10              |
| 9  | D_5_Candidatus Saccharimonas              | 3.07              | 3.93              | 2.92              | 0.76              | 0.44              | 0.24              |
| 10 | D_5_Parabacteroides                       | 1.28              | 1.86              | 1.60              | 0.94              | 1.16              | 0.85              |
| 11 | D_5_Lactobacillus                         | 2.08              | 2.74              | 3.93              | 1.39              | 0.91              | 1.42              |
| 12 | D_5_Ruminiclostridium                     | 3.30              | 3.06              | 2.37              | 0.44              | 0.82              | 0.47              |
| 13 | D_5_Alloprevotella                        | 0                 | 0                 | 0                 | 5.52              | 1.97              | 2.87              |
| 14 | D_5_Bacteroides                           | 0                 | 1.09              | 0                 | 2.01              | 2.52              | 2.97              |
| 15 | D_5_uncultured bacterium                  | 1.06              | 0.81              | 0.70              | 0.35              | 0.57              | 0.42              |
| 16 | D_5_Alistipes                             | 0.37              | 0.43              | 0.29              | 2.18              | 2.99              | 2.46              |
| 17 | D_5_Faecalibaculum                        | 0                 | 0.02              | 0.005             | 0.52              | 0.56              | 0.40              |
| 18 | D_5_Prevotellaceae UCG-001                | 0                 | 0                 | 0                 | 1.95              | 0.75              | 1.01              |
| 19 | D_5_Muribaculum                           | 0                 | 0.08              | 0                 | 1.14              | 0.87              | 1.10              |
| 20 | D_5_Bifidobacterium                       | 0.26              | 0.009             | 0                 | 0.73              | 0.64              | 0.76              |
| 21 | D_5_Intestinimonas                        | 1.53              | 2.33              | 1.46              | 0.18              | 0.24              | 0.21              |
| 22 | D_5_Dubosiella                            | 0                 | 0                 | 0                 | 2.80              | 2.92              | 2.09              |
| 23 | D_5_Desulfovibrio                         | 0.28              | 0.19              | 0.22              | 0.02              | 0.07              | 0.01              |
| 24 | D_5_Ruminococcaceae UCG-014               | 2.73              | 1.35              | 1.78              | 3.82              | 6.00              | 6.08              |
| 25 | D_5_uncultured                            | 6.95              | 6.47              | 5.34              | 1.58              | 1.76              | 1.26              |
| 26 | D_5_[Eubacterium] ventriosum group        | 0.26              | 0.23              | 0.26              | 0                 | 0                 | 0.006             |
| 27 | D_5_Prevotellaceae NK3B31 group           | 0                 | 0                 | 0                 | 0.52              | 1.72              | 1.62              |
| 28 | D_5_[Eubacterium] ruminantium group       | 0                 | 0                 | 0                 | 0.16              | 0                 | 0.36              |
| 29 | D_5_uncultured                            | 0.57              | 0.53              | 0.41              | 0.32              | 0.86              | 1.07              |
| 30 | Ambiguous_taxa                            | 0.44              | 0.42              | 0.64              | 0.32              | 0.29              | 0.35              |
| 31 | D_5_Blautia                               | 0.34              | 0.69              | 0.40              | 0.20              | 0.36              | 0.26              |
| 32 | D_5_Ruminiclostridium 9                   | 1.36              | 1.29              | 1.10              | 0.55              | 1.13              | 1.06              |
| 33 | D_5_Rikenellaceae RC9 gut group           | 0                 | 0                 | 0                 | 1.12              | 0.13              | 1.44              |
| 34 | D_5_uncultured                            | 0                 | 0                 | 0                 | 0.12              | 0.14              | 0.04              |
| 35 | D_5_[Eubacterium] xylanophilum group      | 0.46              | 0.52              | 0.41              | 0.05              | 0.41              | 0.21              |
| 36 | D_5_Lachnospiraceae UCG-001               | 1.65              | 1.07              | 0.97              | 0.19              | 0.23              | 0.14              |
| 37 | D_5_Oscillibacter                         | 1.41              | 1.07              | 0.95              | 0.48              | 0.61              | 0.67              |
| 38 | D_5_uncultured Clostridia bacterium       | 0.11              | 0.06              | 0.21              | 0.006             | 0.01              | 0.009             |
| 39 | D_5_Marvinbryantia                        | 0.33              | 0.29              | 0.24              | 0.02              | 0.14              | 0.02              |
| 40 | D_5_Parasutterella                        | 0                 | 0                 | 0                 | 1.83              | 1.74              | 1.77              |
| 41 | D_5_Ruminococcaceae UCG-009               | 0.45              | 0.27              | 0.28              | 0.14              | 0.17              | 0.16              |
| 42 | D_5_uncultured                            | 0.27              | 0.22              | 0.18              | 0.50              | 0.25              | 0.41              |
| 43 | D_5_Ruminococcus 1                        | 1.20              | 0.06              | 0                 | 1.02              | 1.23              | 1.12              |
| 44 | D_5_Prevotellaceae Ga6A1 group            | 0                 | 0                 | 0                 | 0.61              | 0.16              | 0.67              |
| 45 | D_5_Ruminiclostridium 6                   | 0.28              | 0.37              | 0.43              | 0.31              | 0.35              | 0.33              |
| 46 | D_5_Clostridium sensu stricto 1           | 0.31              | 0.59              | 0.42              | 0.05              | 0.02              | 0.17              |
| 47 | D_5_Roseburia                             | 0.53              | 0.99              | 0.53              | 0.26              | 0.17              | 0.21              |
| 48 | D_5_Lachnoclostridium                     | 0.82              | 0.74              | 0.41              | 0.09              | 0.40              | 0.20              |
| 49 | D_5_GCA-900066575                         | 0.66              | 0.48              | 0.44              | 0.15              | 0.17              | 0.13              |
| 50 | D_5_Odoribacter                           | 0                 | 0                 | 0                 | 0.68              | 1.06              | 0.45              |
| 51 | D_5_Leibacterium                          | 0                 | 0                 | 0                 | 0.12              | 0.23              | 0.08              |
| 52 | D_5_A2                                    | 0.97              | 0.63              | 0.46              | 0.02              | 0.20              | 0.06              |
| 53 | D_5_Ruminiclostridium 5                   | 0.47              | 0.85              | 0.43              | 0.09              | 0.18              | 0.20              |



|    |                                  |      |      |       |       |       |       |
|----|----------------------------------|------|------|-------|-------|-------|-------|
| 54 | D_5__Anaeroplasma                | 0    | 0    | 0     | 0.16  | 0.31  | 0.20  |
| 55 | D_5__Lachnospira                 | 0.39 | 0.36 | 0.27  | 0.003 | 0.004 | 0.004 |
| 56 | D_5__Romboutsia                  | 0.68 | 1.27 | 0.52  | 0.04  | 0     | 0.08  |
| 57 | D_5__Anaerostipes                | 0    | 0    | 0     | 0.08  | 0.14  | 0.012 |
| 58 | D_5__uncultured                  | 0.05 | 0.08 | 0.001 | 0.15  | 0.14  | 0.10  |
| 59 | D_5__Anaerotruncus               | 0.16 | 0.34 | 0.18  | 0.06  | 0.07  | 0.04  |
| 60 | D_5__uncultured bacterium        | 0.16 | 0.25 | 0.09  | 0.08  | 0.17  | 0.07  |
| 61 | D_5__Azospirillum sp. 47_25      | 0    | 0    | 0     | 0.20  | 0.23  | 0.18  |
| 62 | D_5__Escherichia-Shigella        | 0.04 | 0.26 | 0.04  | 0.003 | 0.01  | 0.009 |
| 63 | D_5__Ruminococcaceae UCG-010     | 0.10 | 0.03 | 0.04  | 0.27  | 0.21  | 0.28  |
| 64 | D_5__Prevotellaceae UCG-003      | 0    | 0    | 0     | 0.009 | 0.06  | 0.53  |
| 65 | D_5__Butyrivimonas               | 0    | 0    | 0     | 0.02  | 0.05  | 0.14  |
| 66 | D_5__uncultured bacterium        | 0    | 0    | 0     | 0.51  | 0.09  | 0.51  |
| 67 | D_5__uncultured rumen bacterium  | 0    | 0    | 0     | 0.12  | 0.05  | 0.14  |
| 68 | D_5__uncultured bacterium        | 0    | 0    | 0     | 0.06  | 0.05  | 0.12  |
| 69 | D_5__Lachnospiraceae NK4B4 group | 0.20 | 0.11 | 0.14  | 0     | 0     | 0     |
| 70 | D_5__Ruminococcaceae UCG-005     | 0.15 | 0.05 | 0.03  | 0.03  | 0.04  | 0.03  |
| 71 | Other < 0.5%                     | 1.83 | 1.73 | 1.68  | 1.69  | 2.09  | 2.19  |

**Table S7. Comparison of taxonomy abundance at the species level.**

|    | Species                                | 0m_<br>PBW<br>(%) | 0m_<br>MBW<br>(%) | 0m_<br>NBW<br>(%) | 3m_<br>PBW<br>(%) | 3m_<br>MBW<br>(%) | 3m_<br>NBW<br>(%) |
|----|----------------------------------------|-------------------|-------------------|-------------------|-------------------|-------------------|-------------------|
| 1  | D_6_uncultured bacterium               | 0                 | 0.90              | 0                 | 14.55             | 13.67             | 7.41              |
| 2  | Ambiguous_taxa                         | 3.83              | 6.44              | 6.27              | 13.43             | 14.75             | 12.42             |
| 3  | D_6_uncultured organism                | 16.44             | 16.27             | 25.67             | 0.58              | 0.41              | 0.62              |
| 4  | D_6_uncultured bacterium               | 37.55             | 34.49             | 34.38             | 21.29             | 14.46             | 22.34             |
| 5  | D_6_Turicibacter sp. LA61              | 1.16              | 1.26              | 1.37              | 2.03              | 2.16              | 1.58              |
| 6  | D_6_uncultured Bacteroidales bacterium | 2.34              | 2.01              | 2.25              | 7.49              | 10.94             | 7.70              |
| 7  | D_6_Trichinella pseudospiralis         | 0                 | 0                 | 0                 | 0.26              | 1.58              | 4.84              |
| 8  | D_6_Lachnospiraceae bacterium 10-1     | 0                 | 0                 | 0                 | 2.13              | 0.45              | 1.65              |
| 9  | D_6_uncultured bacterium               | 3.77              | 4.65              | 3.34              | 0.88              | 0.54              | 0.29              |
| 10 | D_6_uncultured Parabacteroides sp.     | 1.48              | 2.25              | 1.88              | 0                 | 0.02              | 0.01              |
| 11 | D_6_Lactobacillus murinus              | 2.09              | 1.06              | 2.33              | 0.48              | 0.22              | 0.53              |
| 12 | D_6_uncultured rumen bacterium         | 0.37              | 0                 | 0                 | 0.60              | 1.01              | 1.43              |
| 13 | D_6_uncultured bacterium               | 3.97              | 3.65              | 2.72              | 0.49              | 0.97              | 0.59              |
| 14 | D_6_gut metagenome                     | 0                 | 0                 | 0                 | 6.57              | 2.42              | 3.64              |
| 15 | D_6_uncultured bacterium               | 1.28              | 0.98              | 0.81              | 0.40              | 0.69              | 0.54              |
| 16 | D_6_uncultured bacterium               | 0                 | 0.01              | 0.007             | 1.88              | 2.96              | 2.39              |
| 17 | D_6_uncultured bacterium               | 3.97              | 4.77              | 2.73              | 2.35              | 3.27              | 2.37              |
| 18 | D_6_uncultured bacterium               | 0                 | 0.02              | 0.005             | 0.60              | 0.66              | 0.48              |
| 19 | D_6_uncultured bacterium               | 0                 | 0.10              | 0                 | 1.35              | 1.05              | 1.37              |
| 20 | D_6_uncultured bacterium               | 1.84              | 2.88              | 1.67              | 0.09              | 0.13              | 0.09              |
| 21 | D_6_uncultured bacterium               | 0                 | 0                 | 0                 | 3.16              | 3.43              | 1.49              |
| 22 | D_6_uncultured bacterium               | 0.35              | 0.24              | 0.26              | 0.03              | 0.08              | 0.01              |
| 23 | D_6_Clostridiales bacterium CIEAF 020  | 0                 | 0                 | 0                 | 0.33              | 0.86              | 1.28              |
| 24 | D_6_Bacteroides caecimuris             | 0                 | 0                 | 0                 | 0.61              | 0.48              | 0.29              |
| 25 | D_6_Bacteroides acidifaciens           | 0                 | 0                 | 0                 | 0.38              | 0.25              | 0.09              |
| 26 | D_6_uncultured bacterium               | 0.61              | 0.64              | 0.69              | 0.36              | 0.43              | 0.57              |
| 27 | D_6_uncultured bacterium               | 0                 | 0                 | 0                 | 0.63              | 2.07              | 2.11              |
| 28 | D_6_uncultured bacterium               | 3.94              | 3.55              | 2.53              | 0.96              | 1.29              | 1.08              |
| 29 | D_6_uncultured bacterium               | 0                 | 0                 | 0                 | 0.20              | 0                 | 0.45              |
| 30 | D_6_Clostridium sp. Culture-1          | 0.23              | 0.18              | 0.18              | 0.15              | 0.61              | 1.11              |
| 31 | Ambiguous_taxa                         | 0.53              | 0.53              | 0.75              | 0.37              | 0.35              | 0.44              |
| 32 | D_6_unidentified                       | 0.43              | 0.25              | 0.27              | 0.35              | 0.44              | 0.27              |
| 33 | D_6_uncultured Bacteroidales bacterium | 0                 | 0                 | 0.00              | 0.96              | 1.13              | 0.76              |
| 34 | D_6_uncultured Clostridiales bacterium | 0.81              | 0.49              | 0.36              | 1.18              | 1.80              | 0.14              |
| 35 | Ambiguous_taxa                         | 0                 | 0                 | 0                 | 1.19              | 0.16              | 1.69              |
| 36 | Ambiguous_taxa                         | 0                 | 0                 | 0                 | 0.14              | 0.17              | 0.05              |
| 37 | D_6_uncultured bacterium               | 0.56              | 0.61              | 0.47              | 0.06              | 0.50              | 0.26              |
| 38 | D_6_uncultured bacterium               | 1.94              | 1.25              | 1.13              | 0.23              | 0.25              | 0.18              |
| 39 | D_6_uncultured organism                | 0                 | 0                 | 0                 | 0.41              | 0.11              | 0.34              |
| 40 | D_6_unidentified                       | 0.83              | 0.44              | 0.27              | 0.18              | 0.16              | 0.15              |
| 41 | D_6_Parabacteroides distasonis         | 0                 | 0                 | 0                 | 0.05              | 0.14              | 0.18              |
| 42 | D_6_Lachnospiraceae bacterium COE1     | 0.34              | 0.50              | 0.38              | 0.08              | 0.47              | 0.32              |
| 43 | D_6_uncultured Clostridia bacterium    | 0.12              | 0.06              | 0.24              | 0.008             | 0.01              | 0.01              |
| 44 | D_6_uncultured bacterium               | 0.32              | 0.28              | 0.21              | 0.00              | 0.15              | 0.00              |
| 45 | D_6_Bacteroides dorei                  | 0                 | 0                 | 0                 | 0.07              | 0.06              | 0.27              |
| 46 | D_6_uncultured bacterium               | 0                 | 0                 | 0                 | 1.20              | 0.29              | 0.63              |
| 47 | Ambiguous_taxa                         | 0.54              | 0.32              | 0.33              | 0.16              | 0.20              | 0.19              |
| 48 | D_6_uncultured bacterium               | 0.32              | 0.26              | 0.21              | 0.18              | 0.20              | 0.17              |
| 49 | D_6_Firmicutes bacterium M10-2         | 0                 | 0                 | 0                 | 0                 | 0                 | 1.03              |
| 50 | Ambiguous_taxa                         | 0                 | 0                 | 0                 | 0.69              | 0.18              | 0.85              |
| 51 | D_6_uncultured bacterium               | 0.12              | 0.23              | 0.43              | 0.39              | 1.11              | 1.11              |
| 52 | D_6_uncultured bacterium               | 0                 | 0                 | 0                 | 0.29              | 0.30              | 0.42              |

|    |                                        |      |      |       |      |      |       |
|----|----------------------------------------|------|------|-------|------|------|-------|
| 53 | D_6_uncultured bacterium               | 0.69 | 0.55 | 0.50  | 0.37 | 0.78 | 0.85  |
| 54 | D_6_uncultured bacterium               | 0.38 | 0.70 | 0.48  | 0.06 | 0.03 | 0.22  |
| 55 | D_6_uncultured bacterium               | 0.39 | 0.86 | 0.33  | 0.09 | 0.09 | 0.12  |
| 56 | D_6_uncultured bacterium               | 0.56 | 0.43 | 0.18  | 0.05 | 0.32 | 0.19  |
| 57 | D_6_uncultured bacterium               | 0.56 | 0.43 | 0.35  | 0.08 | 0.17 | 0.15  |
| 58 | D_6_uncultured bacterium               | 0    | 0    | 0     | 0.57 | 0.95 | 0.21  |
| 59 | D_6_Lactobacillus reuteri              | 0.04 | 0.16 | 0.20  | 0.18 | 0.07 | 0.13  |
| 60 | Ambiguous_taxa                         | 0    | 0    | 0     | 0.14 | 0.28 | 0.09  |
| 61 | D_6_Lachnospiraceae bacterium A2       | 0.75 | 0.51 | 0.37  | 0    | 0.01 | 0.006 |
| 62 | Ambiguous_taxa                         | 0.47 | 0.71 | 0.38  | 0.03 | 0.09 | 0.07  |
| 63 | D_6_uncultured bacterium               | 0    | 0    | 0     | 0.19 | 0.38 | 0.24  |
| 64 | D_6_uncultured bacterium               | 0    | 0    | 0     | 0.34 | 0.09 | 0.14  |
| 65 | D_6_Burkholderiales bacterium YL45     | 0    | 0    | 0     | 0.69 | 1.27 | 0.87  |
| 66 | D_6_mouse gut metagenome               | 0.16 | 0.28 | 0.17  | 0    | 0    | 0     |
| 67 | Ambiguous_taxa                         | 0    | 0    | 0     | 0.03 | 0.13 | 0.01  |
| 68 | D_6_uncultured bacterium               | 0.07 | 0.11 | 0.002 | 0.17 | 0.17 | 0.13  |
| 69 | D_6_uncultured bacterium               | 0.20 | 0.43 | 0.20  | 0.08 | 0.09 | 0.05  |
| 70 | Ambiguous_taxa                         | 0    | 0.00 | 0     | 0.24 | 0.27 | 0.33  |
| 71 | D_6_Clostridium sp. Culture-27         | 0.46 | 0.24 | 0.38  | 0.02 | 0.05 | 0.01  |
| 72 | D_6_uncultured bacterium               | 0.19 | 0.29 | 0.10  | 0.10 | 0.20 | 0.09  |
| 73 | D_6_Azospirillum sp. 47_25             | 0    | 0    | 0     | 0.24 | 0.27 | 0.22  |
| 74 | D_6_gut metagenome                     | 0    | 0    | 0     | 0.35 | 0.24 | 0.38  |
| 75 | D_6_uncultured bacterium               | 0    | 0    | 0     | 0.01 | 0.07 | 0.70  |
| 76 | D_6_uncultured bacterium               | 0.42 | 0.28 | 0.16  | 0.03 | 0.05 | 0.07  |
| 77 | D_6_uncultured bacterium               | 0    | 0    | 0     | 0    | 0    | 0.28  |
| 78 | D_6_uncultured rumen bacterium         | 0.03 | 0    | 0.09  | 0.11 | 0.08 | 0.06  |
| 79 | D_6_uncultured bacterium               | 0    | 0    | 0     | 0.59 | 0.11 | 0.67  |
| 80 | D_6_uncultured rumen bacterium         | 0    | 0    | 0     | 0.14 | 0.06 | 0.16  |
| 81 | Ambiguous_taxa                         | 0    | 0    | 0     | 0    | 0    | 0.13  |
| 82 | D_6_uncultured organism                | 0    | 0    | 0     | 0.13 | 0.04 | 0.02  |
| 83 | D_6_uncultured bacterium               | 0    | 0    | 0     | 0.25 | 0.18 | 0.12  |
| 84 | D_6_Bacteroides massiliensis B84634    | 0    | 0    | 0     | 0.03 | 0.30 | 0.20  |
| 85 | D_6_uncultured bacterium               | 0    | 0    | 0     | 0.07 | 0.06 | 0.14  |
| 86 | D_6_uncultured bacterium               | 0.23 | 0.14 | 0.16  | 0    | 0    | 0     |
| 87 | Ambiguous_taxa                         | 0    | 0    | 0     | 0    | 0    | 0.11  |
| 88 | D_6_uncultured bacterium               | 0.02 | 0.15 | 0.02  | 0.02 | 0.00 | 0.009 |
| 89 | D_6_uncultured bacterium               | 0    | 0    | 0     | 0.13 | 0    | 0     |
| 90 | D_6_uncultured Clostridiales bacterium | 0    | 0    | 0     | 0.07 | 0.02 | 0.15  |
| 91 | D_6_Clostridium sp. Clone-44           | 0.02 | 0.12 | 0.11  | 0    | 0    | 0     |
| 92 | Ambiguous_taxa                         | 0    | 0    | 0     | 0    | 0.18 | 0     |
| 93 | D_6_uncultured bacterium               | 0    | 0    | 0     | 0    | 0    | 0.09  |
| 94 | Other < 0.5%                           | 2.27 | 2.02 | 1.69  | 1.98 | 2.89 | 2.31  |

**Table S8. The  $\alpha$ -diversity indexes for each sample and group.**

| Sample   | Observed | ACE    | Shannon | Simpson | InvSimpson | Fisher |
|----------|----------|--------|---------|---------|------------|--------|
| 0m_PBW_1 | 204      | 204.15 | 3.99    | 0.961   | 25.94      | 27.52  |
| 0m_PBW_2 | 234      | 234.00 | 4.52    | 0.980   | 49.80      | 31.97  |
| 0m_PBW_3 | 217      | 217.43 | 4.16    | 0.967   | 29.92      | 29.26  |
| 0m_PBW_4 | 201      | 201.00 | 4.19    | 0.973   | 36.42      | 28.32  |
| 0m_PBW_5 | 184      | 184.25 | 4.18    | 0.969   | 32.40      | 25.63  |
| 0m_MBW_1 | 225      | 225.48 | 4.30    | 0.973   | 37.32      | 31.04  |
| 0m_MBW_2 | 206      | 206.15 | 4.10    | 0.965   | 28.67      | 28.21  |
| 0m_MBW_3 | 217      | 217.00 | 4.44    | 0.978   | 44.45      | 29.98  |
| 0m_MBW_4 | 181      | 181.21 | 3.83    | 0.957   | 23.27      | 23.87  |
| 0m_MBW_5 | 232      | 232.76 | 4.36    | 0.974   | 38.29      | 31.95  |
| 0m_MBW_6 | 194      | 194.64 | 4.03    | 0.966   | 29.34      | 26.57  |
| 0m_NBW_1 | 158      | 158.32 | 3.57    | 0.935   | 15.30      | 20.55  |
| 0m_NBW_2 | 212      | 212.47 | 4.29    | 0.972   | 36.12      | 29.26  |
| 0m_NBW_3 | 201      | 201.00 | 4.03    | 0.960   | 25.02      | 27.58  |
| 0m_NBW_4 | 162      | 162.00 | 3.64    | 0.952   | 20.98      | 20.68  |
| 0m_NBW_5 | 208      | 208.00 | 4.02    | 0.958   | 23.63      | 28.25  |
| 0m_NBW_6 | 210      | 210.00 | 4.26    | 0.973   | 37.50      | 28.51  |
| 3m_PBW_1 | 270      | 270.76 | 4.12    | 0.935   | 15.28      | 43.19  |
| 3m_PBW_2 | 305      | 305.46 | 4.39    | 0.969   | 32.70      | 46.08  |
| 3m_PBW_3 | 291      | 291.31 | 4.34    | 0.969   | 32.71      | 43.50  |
| 3m_PBW_4 | 318      | 319.11 | 3.97    | 0.946   | 18.43      | 47.03  |
| 3m_PBW_5 | 383      | 384.08 | 4.66    | 0.969   | 31.93      | 60.19  |
| 3m_MBW_1 | 356      | 356.61 | 4.62    | 0.968   | 31.15      | 54.17  |
| 3m_MBW_2 | 410      | 411.15 | 4.66    | 0.972   | 35.20      | 62.43  |
| 3m_MBW_3 | 339      | 339.73 | 4.76    | 0.981   | 52.98      | 52.19  |
| 3m_MBW_4 | 386      | 386.31 | 4.61    | 0.969   | 32.24      | 59.04  |
| 3m_MBW_5 | 326      | 326.56 | 4.43    | 0.967   | 29.89      | 50.19  |
| 3m_MBW_6 | 343      | 344.93 | 3.58    | 0.882   | 8.49       | 49.63  |
| 3m_NBW_1 | 318      | 320.19 | 4.71    | 0.983   | 58.02      | 48.07  |
| 3m_NBW_2 | 307      | 309.10 | 4.23    | 0.955   | 22.34      | 46.82  |
| 3m_NBW_3 | 371      | 371.48 | 4.68    | 0.976   | 41.95      | 57.05  |
| 3m_NBW_4 | 352      | 352.16 | 4.63    | 0.973   | 36.62      | 53.01  |
| 3m_NBW_5 | 246      | 249.46 | 4.28    | 0.970   | 33.60      | 38.53  |
| 3m_NBW_6 | 418      | 420.38 | 4.27    | 0.957   | 23.18      | 61.94  |

| Group  | Observed | ACE    | Shannon | Simpson | InvSimpson | Fisher |
|--------|----------|--------|---------|---------|------------|--------|
| 0m_PBW | 208      | 208.17 | 4.21    | 0.970   | 34.89      | 28.54  |
| 0m_MBW | 209.17   | 209.54 | 4.18    | 0.969   | 33.56      | 28.60  |
| 0m_NBW | 191.83   | 191.97 | 3.97    | 0.958   | 26.43      | 25.81  |
| 3m_PBW | 313.40   | 314.14 | 4.30    | 0.958   | 26.21      | 48.00  |
| 3m_MBW | 360      | 360.88 | 4.44    | 0.956   | 31.66      | 54.61  |
| 3m_NBW | 335.33   | 337.13 | 4.47    | 0.969   | 35.95      | 50.90  |

**Table S9. The co-occurrence network indices.**

| <b>Network indexes indices</b> | <b>0m_<br/>PBW</b> | <b>0m_<br/>MBW</b> | <b>0m_<br/>NBW</b> | <b>3m_<br/>PBW</b> | <b>3m_<br/>MBW</b> | <b>3m_<br/>NBW</b> |
|--------------------------------|--------------------|--------------------|--------------------|--------------------|--------------------|--------------------|
| Node                           | 120                | 120                | 113                | 150                | 157                | 158                |
| Edge                           | 133                | 123                | 129                | 138                | 153                | 149                |
| Network Density                | 0.019              | 0.017              | 0.020              | 0.012              | 0.012              | 0.012              |
| Assortativity                  | -0.013             | -0.013             | -0.015             | -0.009             | -0.009             | -0.008             |
| Module                         | 34                 | 37                 | 33                 | 45                 | 30                 | 47                 |
| Modularity                     | 0.894              | 0.895              | 0.817              | 0.929              | 0.951              | 0.957              |

**Table S10. The taxonomic classification of the intestinal microbes most different between PBW and NBW groups.**

| <b>Most abundant in PBW</b> |                                  |                                  |                                  |
|-----------------------------|----------------------------------|----------------------------------|----------------------------------|
| <b>Rank</b>                 | <b>1</b>                         | <b>2</b>                         | <b>3</b>                         |
| <b>OUT</b>                  | OTU0001                          | OTU0039                          | OTU0083                          |
| <b>Kingdom</b>              | D_0__Bacteria                    | D_0__Bacteria                    | D_0__Bacteria                    |
| <b>Phylum</b>               | D_1__Verrucomicrobia             | D_1__Bacteroidetes               | D_1__Firmicutes                  |
| <b>Class</b>                | D_2__Verrucomicrobiae            | D_2__Bacteroidia                 | D_2__Erysipelotrichia            |
| <b>Order</b>                | D_3__Verrucomicrobiales          | D_3__Bacteroidales               | D_3__Erysipelotrichales          |
| <b>Family</b>               | D_4__Akkermansiaceae             | D_4__Prevotellaceae              | D_4__Erysipelotrichaceae         |
| <b>Genus</b>                | D_5__Akkermansia                 | D_5__Alloprevotella              | D_5__Dubosiella                  |
| <b>Species</b>              | <b>D_6__uncultured bacterium</b> | <b>D_6__uncultured bacterium</b> | <b>D_6__uncultured bacterium</b> |
| <b>sseqid</b>               | NR_074436.1                      | NR_144750.1                      | NR_042110.1                      |

| <b>Most abundant in NBW</b> |                                        |                                  |                                  |
|-----------------------------|----------------------------------------|----------------------------------|----------------------------------|
| <b>Rank</b>                 | <b>1</b>                               | <b>2</b>                         | <b>3</b>                         |
| <b>OUT</b>                  | OTU0024                                | OTU0108                          | OTU0004                          |
| <b>Kingdom</b>              | D_0__Bacteria                          | D_0__Bacteria                    | D_0__Bacteria                    |
| <b>Phylum</b>               | D_1__Firmicutes                        | D_1__Bacteroidetes               | D_1__Bacteroidetes               |
| <b>Class</b>                | D_2__Clostridia                        | D_2__Bacteroidia                 | D_2__Bacteroidia                 |
| <b>Order</b>                | D_3__Clostridiales                     | D_3__Bacteroidales               | D_3__Bacteroidales               |
| <b>Family</b>               | D_4__Lachnospiraceae                   | D_4__Prevotellaceae              | D_4__Muribaculaceae              |
| <b>Genus</b>                | D_5__Lachnospiraceae NK4A136 group     | D_5__Prevotellaceae NK3B31 group | D_5__uncultured bacterium        |
| <b>Species</b>              | <b>D_6__Trichinella pseudospiralis</b> | <b>D_6__uncultured bacterium</b> | <b>D_6__uncultured bacterium</b> |
| <b>sseqid</b>               | NR_026493.1                            | NR_024815.1                      | NR_144616.1                      |
